# Supplementary material
Source: PubMed Central journal article supplement (PMC2952008)
Supplement: 091891_1.pdf [file 091891_1.pdf]

**Appendix 1: Association between pneumococcal vaccination and acute myocardial infarction**

| Ever received pneumococcal vaccination, age, yr | No. (%)      |               | OR (95% CI)      |                                              |                                                 |
|-------------------------------------------------|--------------|---------------|------------------|----------------------------------------------|-------------------------------------------------|
|                                                 | Cases        | Controls      | Unadjusted       | Adjusted* (except for influenza vaccination) | Adjusted* (including for influenza vaccination) |
| All ages ( $\geq 40$ )                          | 6 153 (35.4) | 21 734 (34.7) | 1.26 (1.20–1.32) | 0.88 (0.84–0.93)                             | 0.96 (0.91–1.02)                                |
| < 65                                            | 622 (11.7)   | 1 600 (7.5)   | 1.67 (1.51–1.84) | 0.83 (0.73–0.95)                             | 0.91 (0.79–1.05)                                |
| $\geq 65$                                       | 5 531 (51.8) | 20 134 (48.7) | 1.18 (1.12–1.24) | 0.88 (0.83–0.93)                             | 0.97 (0.91–1.03)                                |

Note: CI = confidence interval, OR = odds ratio.

\*Adjusted for asthma or chronic obstructive pulmonary disease, chronic heart disease, stroke or transient ischemic attack, diabetes, splenectomy, chronic liver disease, chronic renal failure, immunosuppression and HIV, hyperlipidemia, family history of acute myocardial infarction, peripheral vascular disease, hypertension, smoking status, treatment with acetylsalicylic acid, treatment with statins, treatment with antihypertensives, and general practice consultations.
